# Therapeutic Whole-body Hypothermia Protects Remote Lung, Liver, and Kidney Injuries after Blast Limb Trauma in Rats

Jiaolin Ning, M.D., Ph.D., Liwen Mo, M.Sc., Bin Yi, M.D., Ph.D., Jianteng Gu, M.D., Ph.D., Kaizhi Lu, M.D., Ph.D., Yaying Zhou, B.S.N., Xinan Lai, M.Sc., Hailin Zhao, Ph.D., Daqing Ma, M.D., Ph.D., F.R.C.A.

## ABSTRACT

**Background:** Severe blast limb trauma (BLT) induces distant multiple-organ injuries. In the current study, the authors determined whether whole-body hypothermia (WH) and its optimal duration (if any) afford protection to the local limb damage and distant lung, liver, and kidney injuries after BLT in rats.

**Methods:** Rats with BLT, created by using chartaceous electricity detonators, were randomly treated with WH for 30 min, 60 min, 3 h, and 6 h ( $n = 12/\text{group}$ ). Rectal temperature and arterial blood pressure were monitored throughout. Blood and lung, liver, and kidney tissue samples were harvested for measuring tumor necrosis factor- $\alpha$ , interleukin-6 and interleukin-10, myeloperoxidase activity, hydrogen sulfide, and biomarkers of oxidative stress at 6 h after BLT. The pathologic lung injury and the water content of the lungs, liver, and kidneys and blast limb tissue were assessed.

**Results:** Unlike WH for 30 min, WH for 60 min reduced lung water content, lung myeloperoxidase activity, and kidney myeloperoxidase activity by 10, 39, and 28% (all  $P < 0.05$ ), respectively. WH for 3 h attenuated distant vital organs and local traumatic limb damage and reduced myeloperoxidase activity, hydrogen peroxide and malondialdehyde concentration, and tumor necrosis factor- $\alpha$  and interleukin-6 levels by up to 49% (all  $P < 0.01$ ). Likewise, WH for 6 h also provided protection to such injured organs but increased blood loss from traumatic limb.

**Conclusions:** Results of this study indicated that WH may provide protection for distant organs and local traumatic limb after blast trauma, which warrants further study. (*ANESTHESIOLOGY* 2016; 124:1360-71)

WITH the development of armor, the number of survivors with blast limb trauma (BLT) increased in modern military conflicts and terrorist attacks.<sup>1,2</sup> When multiple blast trauma is very severe and complicated, it often induces remote multiorgan injuries including the lungs, liver, and kidneys *via* systemic inflammatory responses and oxidative stress and suppression of cystathionine  $\gamma$ -lyase (CSE)/hydrogen sulfide pathway as reported previously.<sup>3,4</sup> The remote multiple-organ injuries not only perplex the condition and treatment, but also prolong recovery. These injuries could lead to multiple-organ dysfunction (MODS) or even failure if no proper interventions are promptly in place.

Whole-body hypothermia (WH) is a therapeutic intervention involving controlled reduction of core temperature to protect organs at risk of injury.<sup>5</sup> To date, WH has principally been used as a protective therapy for various

### What We Already Know about This Topic

- Blast limb trauma induces organ injury due to multiple mechanisms that produce a systemic inflammatory response

### What This Article Tells Us That Is New

- Whole-body hypothermia for 3 h immediately after injury in an experimental animal model provides multiorgan protection for traumatic injury after blast trauma

brain injuries<sup>6</sup>; moreover, there is emerging evidence that it may also be useful to protect other organs when at risk of injury. For example, WH can improve the prognosis of severe sepsis and severe hemorrhagic shock.<sup>7</sup> It has been also reported that WH attenuates the heart,<sup>8</sup> lung, kidney,<sup>9,10</sup> and liver injuries.<sup>11,12</sup> It has been recognized that the therapy window and the duration of WH are very

Supplemental Digital Content is available for this article. Direct URL citations appear in the printed text and are available in both the HTML and PDF versions of this article. Links to the digital files are provided in the HTML text of this article on the Journal's Web site ([www.anesthesiology.org](http://www.anesthesiology.org)). Drs. Ning and Mo contributed equally to this work.

Submitted for publication August 28, 2015. Accepted for publication February 24, 2016. From the Department of Anesthesiology, Southwest Hospital, Third Military Medical University, Chongqing, China (J.N., B.Y., J.G., K.L., Y.Z.); Department of Nephrology, People's Liberation Army Chengdu Military Area Command General Hospital, Chengdu, Sichuan, China (L.M.); Department of Traumatic Surgery, State Key Laboratory of Trauma and Burns, Surgery Research Institute, Daping Hospital, Third Military Medical University, Chongqing, China (X.L.); and Anaesthetics, Pain Medicine and Intensive Care, Faculty of Medicine, Department of Surgery and Cancer, London, United Kingdom (H.Z., D.M.).

Copyright © 2016, the American Society of Anesthesiologists, Inc. Wolters Kluwer Health, Inc. All Rights Reserved. *Anesthesiology* 2016; 124:1360-71

important for achieving promising protective outcome. In general, early application of therapeutic hypothermia can be more effective than late application.<sup>13,14</sup> Mild hypothermia is preferable because it can provide considerable protective effects and has minimal adverse effects.<sup>15,16</sup> It has been reported that prolonged hypothermia did not improve the protective effects, but increased adverse effects.<sup>17,18</sup> Mild hypothermia for 24 h is recommended for brain protection after cardiac arrest.<sup>19</sup> It has also been demonstrated that mild hypothermia for 1 h improved the final outcome in uncontrolled hemorrhagic shock rats<sup>20</sup> and 2.5 h of hypothermia afforded hepatic protection in multiple-trauma swine model.<sup>21,22</sup> Interestingly, regional cooling for 30 min of traumatic limb was enough to afford maximum protection for the remote lung injury.<sup>4</sup> Clearly, the optimal duration of hypothermic therapy varies with different diseases or pathologic conditions.

To extend our previous findings,<sup>4</sup> we hypothesized that WH could also attenuate organs injuries after BLT, but may be even more effective than regional hypothermia. Therefore, the aim of the current study is to determine whether WH affords protection to the local limb damage and distant lung, liver, and kidney injuries and the optimal duration of WH for such injuries after BLT in rats.

## Materials and Methods

After approval of the protocol by the Third Military Medical University Animal Care Committee (Chongqing, China), the experiments were performed according to the Chinese Institutes of Health Guidelines on the Use of Laboratory Animals.

### Animal Model

Anesthesia and methods of creation of BLT in rats have been previously described in detail.<sup>4,23</sup> Briefly, anesthesia was induced with intraperitoneal injection of pentobarbital (50 mg/kg of weight), and adequate anesthesia was achieved *via* injection of pentobarbital intraperitoneally according to the lash flash throughout the experiment. Two catheters (outer diameter, 0.965 mm; inside diameter, 0.58 mm) were inserted: one into the right femoral artery to monitor blood pressure and collect the blood sample and one into the right jugular vein for fluid infusion. Subsequently, rats were randomized into the Sham, which received identical treatment (anesthesia) and manipulations (surgery) but without blast injury, and the blast groups.

Blast limb trauma was induced by using chartaceous electricity detonators (845 Factory, China) containing 80 mg diazodinitrophenol. The injuries were manifested as hemorrhage, open comminuted fracture, Tscherne-Gotzen 3- to 4-degree soft tissue injury, and first-degree burn injury. The blasted limbs were packed with sterile sponges after injury. Normal saline at 4 ml kg<sup>-1</sup> h<sup>-1</sup> was infused, and spontaneous breathing was maintained throughout the experiment.

### Experimental Protocol

After injury, the BLT rats were randomized using a random number generated by a computer to the normothermia group (BLT) and the groups of hypothermia (32° ± 0.5°C) for 30 min (BLT-WH30), 60 min (BLT-WH60), 3 h (BLT-WH3h), and 6 h (BLT-WH6h; n = 12/group; Supplemental Digital Content 1, fig. 1, <http://links.lww.com/ALN/B266>). WH was initiated for the hypothermic group immediately after blast by spraying alcohol onto abdominal skin while an electric fan circulated cool air until rectal temperature reached 33.5°C and rectal temperature was maintained at 32° ± 0.5°C for 30 min, 60 min, 3 h, or 6 h. Then the rats in the groups BLT-WH30, BLT-WH60, and BLT-WH3h were dried with electric hair drier and then placed onto the thermo mattress (40°C) for rewarming to more than 35°C, and this rectal temperature was maintained until the termination of experiment, and the rate of rewarming was kept at 1.5° to 2°C/h (Supplemental Digital Content 2, table 1, <http://links.lww.com/ALN/B267>). Adequate anesthesia was maintained to avoid shivering during the period of cooling and rewarming.

### Measurements

Arterial blood pressure and rectal temperature were continuously monitored with PowerLab (AD Instruments, USA) throughout the experiments. Blood loss induced by blast was calculated by the following formula: blood loss = wet gauze weight – dry gauze weight. After the animals were euthanized by intraperitoneal injection of overdose of pentobarbital at 6 h postinjury, blood and tissue samples of the damaged limb, the right lower lobe of lung, the right kidney, and the left hepatic lobe were harvested for following measurements.

**Histology.** The right lower robe of lung and damaged limb muscle tissue were fixed in 10% formalin for 24 h and then embedded in paraffin. The blocks were sectioned at 5-μm thickness and then stained with hematoxylin–eosin. The pathologic changes of the lungs were scored in a blinded manner through analyzing the following variables: lung edema, hemorrhage, infiltration of the inflammatory cells, thickness of alveolar wall, and pulmonary architecture, as described previously.<sup>4,23</sup> Each variable was graded on a scale of 0 to 4 (0, absent; 1, mild; 2, moderate; 3, severe; and 4, very severe injury). The total histopathology score was expressed as the sum of the scores for statistical analysis.

**Biological Measurements.** Tumor necrosis factor-α (TNFα), interleukin-6, and interleukin-10 levels were measured by enzyme-linked immunosorbent assay according to instructions from the manufacturer (R&D systems, USA). Hydrogen sulfide level was determined using a modified methylene blue assay described previously.<sup>4</sup> Other parameters, including serum creatinine, aspartate aminotransferase, and alanine aminotransferase, were measured by using commercial kits (Jiancheng Biotechnology CO, China). All the biologic measurements were determined in a blinded manner.

### Statistical Analysis

The group size ( $n = 12$ ) was determined at set of  $1-\beta = 0.9$  and  $\alpha = 0.05$  by one-way ANOVA (PASS 10.0 software NCSS, LLC, USA) based on the data of lung histopathology scores from the pilot experiments. No data were missing for final analysis, and data were expressed as mean  $\pm$  SD unless indicated otherwise. Histologic injury scoring data were expressed as a Box-and-whisker plot and analyzed by Kruskal-Wallis nonparametric test followed by Dunn test for comparison. The rest of the data were analyzed by two-tailed ANOVA followed by Tukey comparison test (GraphPadPrism 5, USA). A  $P < 0.05$  was considered to be statistically significant.

## Results

### Physiological Variables

The blood loss from the traumatic limb in the BLT, BLT-WH30, BLT-WH60, and BLT-WH3h groups did not differ

significantly (11.4%, 16.3%, 16.1%, and 17.1% of the body weight, respectively), but WH for 6 h significantly increased the blood loss when compared with that of group BLT (11.4% *vs.* 17.8%,  $P = 0.037$ ).

BLT resulted in reduced mean arterial blood pressure (MBP), and this MBP level was maintained throughout experiments. Hypothermia for any duration did not affect the MBP further (Supplemental Digital Content 2, table 1, <http://links.lww.com/ALN/B267>).

### WH Treatment Attenuated Muscle and Remote Lung Injury after Blast Limb Trauma

In contrast to the normal muscle in the naive rats (fig. 1A), muscle myofilaments were ruptured in the all BLT rats, and the rats also had hemorrhage and muscle swelling (fig. 1, B to F). In the rats treated with WH for 3 (fig. 1E) and 6 h (fig. 1F), muscle swelling was attenuated compared to the BLT rats. These observations were corroborated with the traumatic muscle water content (fig. 1G).

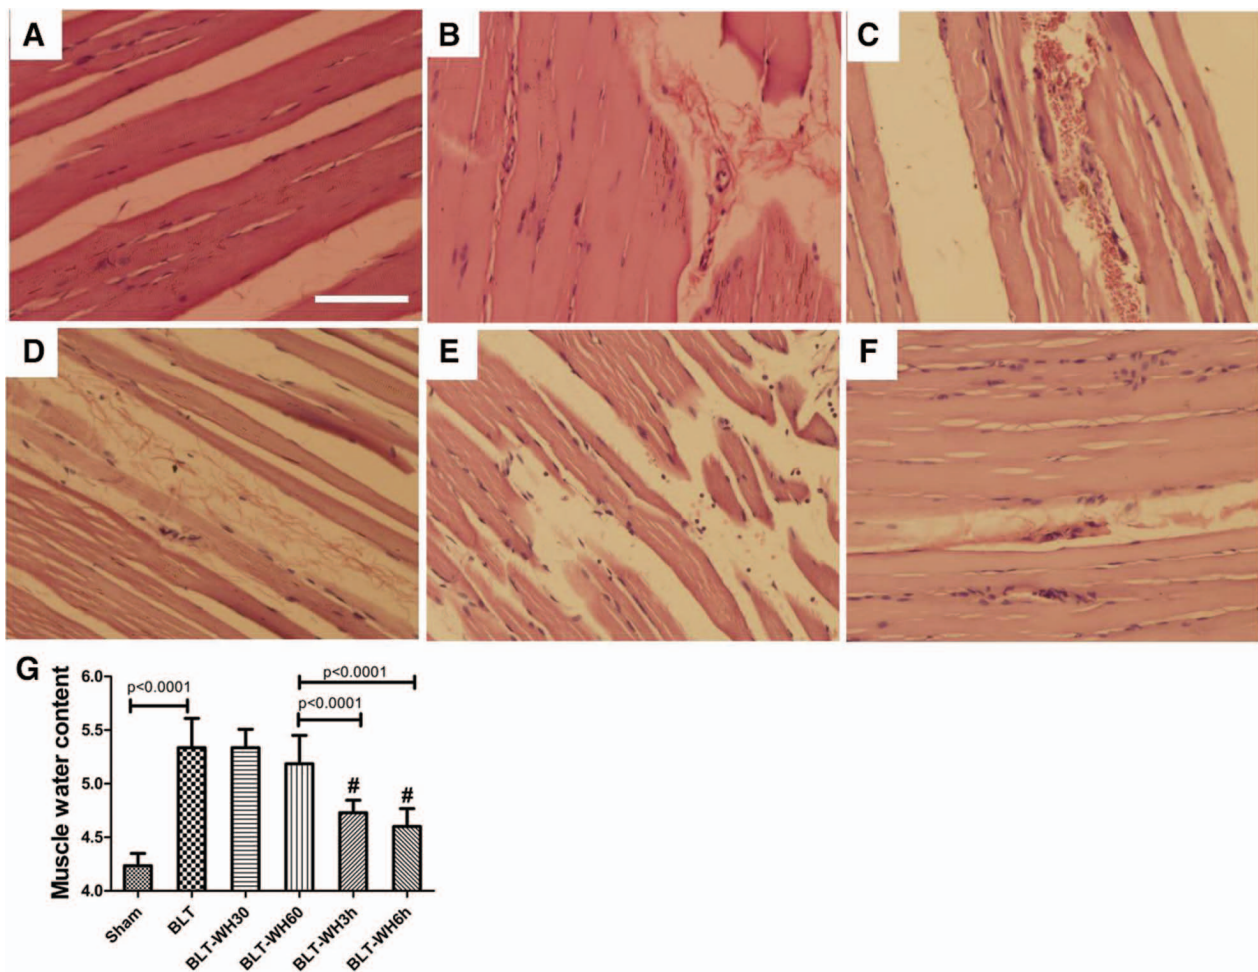

**Fig. 1.** The effects of whole-body hypothermia treatment on the muscle histopathology changes and traumatic tissue edema induced by blast limb trauma. Representative microphotographs were taken from Sham (A), blast limb trauma (BLT; B), and BLT + whole-body hypothermia treatment for 30 min (BLT-WH30; C), 60 min (BLT-WH60; D), 3 h (BLT-WH3h; E), and 6 h (BLT-WH6h; F). Traumatic tissue water content was represented by wet/dry weight (G). Data are presented as mean  $\pm$  SD ( $n = 12$ ). # $P < 0.05$  versus BLT.



In contrast to the normal lung in the Sham rats (fig. 2A), lung histologic changes including congestions, hemorrhage, alveolar wall thickening, and cell infiltration were found in BLT rats (fig. 2B). WH treatment for 30 min (fig. 2C), 60 min (fig. 2D), 3 h (fig. 2E), and 6 h (fig. 2F) alleviated these lung morphologic changes induced by BLT to varying degrees, but only WH treatment for 3 and 6 h significantly decreased the pathology scoring (fig. 2G). Lung water content was decreased in the rats treated with WH for 30 min ( $P = 0.001$ ), 60 min ( $P = 0.002$ ), 3 h ( $P < 0.0001$ ), and 6 h ( $P < 0.0001$ ) compared with that in the BLT rats (fig. 2H).

#### The Effect of WH Treatment on Liver and Kidney Function

Liver water content was decreased in the BLT-WH3h or BLT-WH6h rats compared with that of the BLT rats (fig. 3A). WH for 3 and 6 h attenuated increased serum aspartate aminotransferase (fig. 3B) and alanine aminotransferase

(fig. 3C) induced by BLT. WH for 3 and 6 h alleviated the increased kidney water content induced by BLT (fig. 3D), but serum urea level was found to be not changed in the all groups (fig. 3E).

#### The Effect of WH Treatment on Cytokines

As shown in figure 4A, plasma TNF $\alpha$  was increased 20-fold than that of the Sham rats ( $73.6 \pm 15.4$   $\mu\text{g/ml}$ ,  $P < 0.0001$ ). WH for 3 and 6 h reduced plasma TNF $\alpha$  to 58% ( $P = 0.002$ ) and 66% ( $P = 0.008$ ) of that in the BLT rats, respectively. Plasma interleukin-6 was increased 8.7-fold than that of the Sham rats ( $268.7 \pm 31.7$   $\mu\text{g/ml}$ ,  $P < 0.0001$ ), which was reduced to 63% and 59% by WH for 3 ( $P < 0.0001$ ) and 6 h ( $P < 0.0001$ ), respectively (fig. 4B). Plasma interleukin-10 was increased 2.6-fold than that of the Sham rats ( $139.8 \pm 19.3$   $\mu\text{g/ml}$ ,  $P < 0.0001$ ), but WH for 6 h decreased plasma interleukin-10 significantly ( $P = 0.018$ ; fig. 4C).

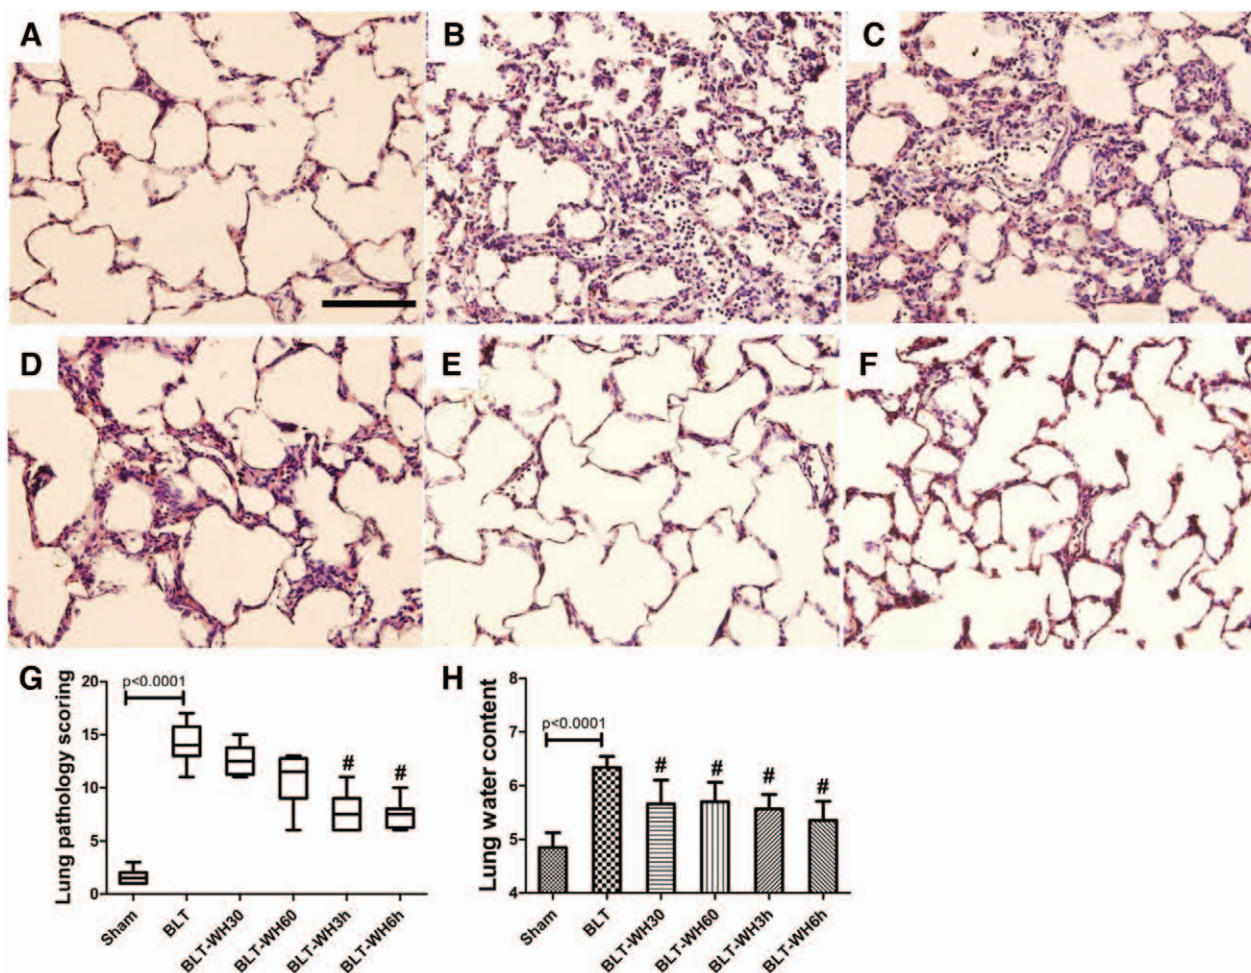

**Fig. 2.** The effects of whole-body hypothermia treatment on the lung histopathology changes and pulmonary edema induced by blast limb trauma. Representative microphotographs were taken from Sham (A), blast limb trauma (BLT; B), and BLT + whole-body hypothermia treatment for 30 min (BLT-WH30; C), 60 min (BLT-WH60; D), 3 h (BLT-WH3h; E), and 6 h (BLT-WH6h; F). Histopathologic scoring data of lung injury are presented in a box-and-whisker plot (the boxes are constructed with 25% and 75% CIs and median and maximum or minimum individual values; G). Lung water content was represented by wet/dry weight (H). Data are presented as mean  $\pm$  SD ( $n = 12$ ). # $P < 0.05$  versus BLT.

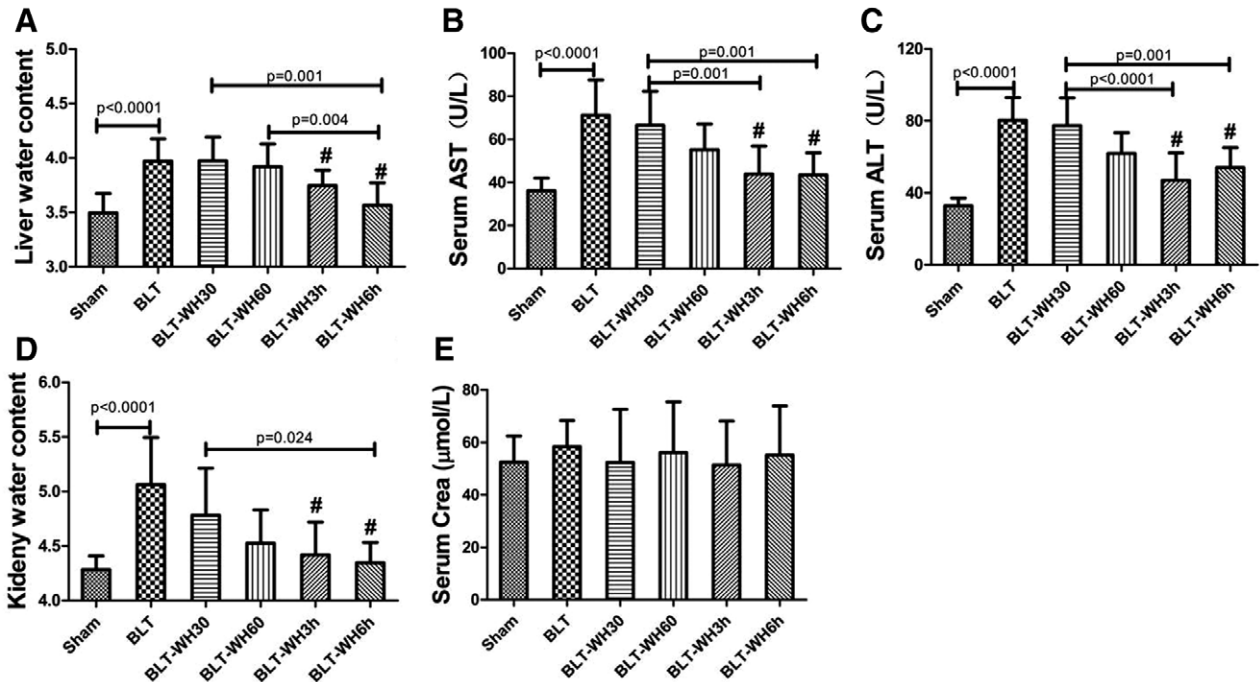

**Fig. 3.** The effects of whole-body hypothermia treatment on liver and kidney water content and biochemistry marker of liver and kidney function in blast limb trauma rats: liver water content (A); serum aspartate aminotransferase (AST [U/L]; B); serum alanine aminotransferase (ALT [U/L]; C); kidney water content (D); and serum creatinine (Crea [ $\mu\text{mol/L}$ ]; E). Data are shown for blast limb trauma (BLT) and BLT + whole-body hypothermia treatment for 30 min (BLT-WH30), 60 min (BLT-WH60), 3 h (BLT-WH3h), and 6 h (BLT-WH6h). Data are presented as mean  $\pm$  SD ( $n = 12$ ). # $P < 0.05$  versus BLT.

#### The Effect of WH on Plasma Hydrogen Sulfide

BLT resulted in a decreased plasma hydrogen sulfide level ( $36.8 \pm 9.5 \mu\text{M}$  vs.  $68.4 \pm 11.7 \mu\text{M}$  of controls,  $P < 0.001$ ). WH for 3 h ( $59.2 \pm 4.2$ ) almost reversed this decrease ( $P = 0.450$ ), and plasma hydrogen sulfide level was lower in the BLT-WH30 ( $P < 0.001$ ), BLT-WH60 ( $P = 0.003$ ), and BLT-WH6h ( $P < 0.001$ ) rats compared with that in the Sham rats (fig. 4D).

#### The Effect of WH on Myeloperoxidase Activity

Myeloperoxidase activity was determined as a surrogate of neutrophil activity. Myeloperoxidase activity in plasma (fig. 5A), muscle (fig. 5B), lung (fig. 5C), liver (fig. 5D), and kidney (fig. 5E) was increased in the BLT rats compared with that in the Sham rats. WH for 3 and 6 h reduced plasma (fig. 5A) and muscle myeloperoxidase activity (fig. 5B) induced by BLT. WH for any durations reduced lung myeloperoxidase when compared with that of BLT rats, but WH for 6 h further reduced lung myeloperoxidase compared with WH for 3 h ( $P = 0.047$ ; fig. 5C). Unlike hypothermia for 30 min, hypothermia for 3 ( $P = 0.014$ ) and 6 h ( $P < 0.0001$ ) reduced liver myeloperoxidase (fig. 5D). WH for 3 ( $P = 0.002$ ) and 6 h ( $P = 0.001$ ) alleviated the increased kidney myeloperoxidase activity induced by BLT, respectively (fig. 5E).

#### WH Attenuated Oxidative Stress in the BLT Rats

As shown in figure 6, BLT resulted in a decreased total antioxidant capacity (T-AOC) in the muscle (fig. 6A),

lung (fig. 6B), liver (fig. 6C), and kidney (fig. 6D). Both WH for 3 and 6 h elevated a decrease of T-AOC in the muscle (fig. 6A), lung (fig. 6B), and kidney (fig. 6D), and WH for 6 h also increased T-AOC in the liver (fig. 6C).

BLT caused a decrease in superoxide dismutase (SOD) activity in plasma (fig. 7A), muscle (fig. 7B), lung (fig. 7C), liver (fig. 7D), and kidney (fig. 7E). All durations of WH had no effects on the SOD activity in plasma (fig. 7A) and kidney (fig. 7E), but the prolonged hypothermia for 3 and 6 h elevated SOD activity in the muscle (fig. 7B), lung (fig. 7C), and liver (fig. 7D).

BLT resulted in a decrease in the glutathione level in the plasma and all the organs measured ( $P < 0.05$ ), but WH treatment did not alter such changes (fig. 8).

BLT resulted in an increase in the malondialdehyde level in the plasma (fig. 9A), muscle (fig. 9B), lung (fig. 9C), liver (fig. 9D), and kidney (fig. 9E). WH for 30 ( $P = 0.033$ ) or 60 ( $P = 0.04$ ) min reduced lung malondialdehyde level in BLT rats (fig. 9, B and C), but WH for 3 or 6 h decreased malondialdehyde level in the plasma and all organs measured (fig. 9).

BLT increased hydrogen peroxide in the plasma and all organs studied (fig. 10). WH for 60 min reduced lung ( $P = 0.016$ ) and liver ( $P = 0.011$ ) hydrogen peroxide level in BLT rats (fig. 10, C and D), and WH for 3 and 6 h decreased hydrogen peroxide in the plasma and concerned organs (fig. 10).



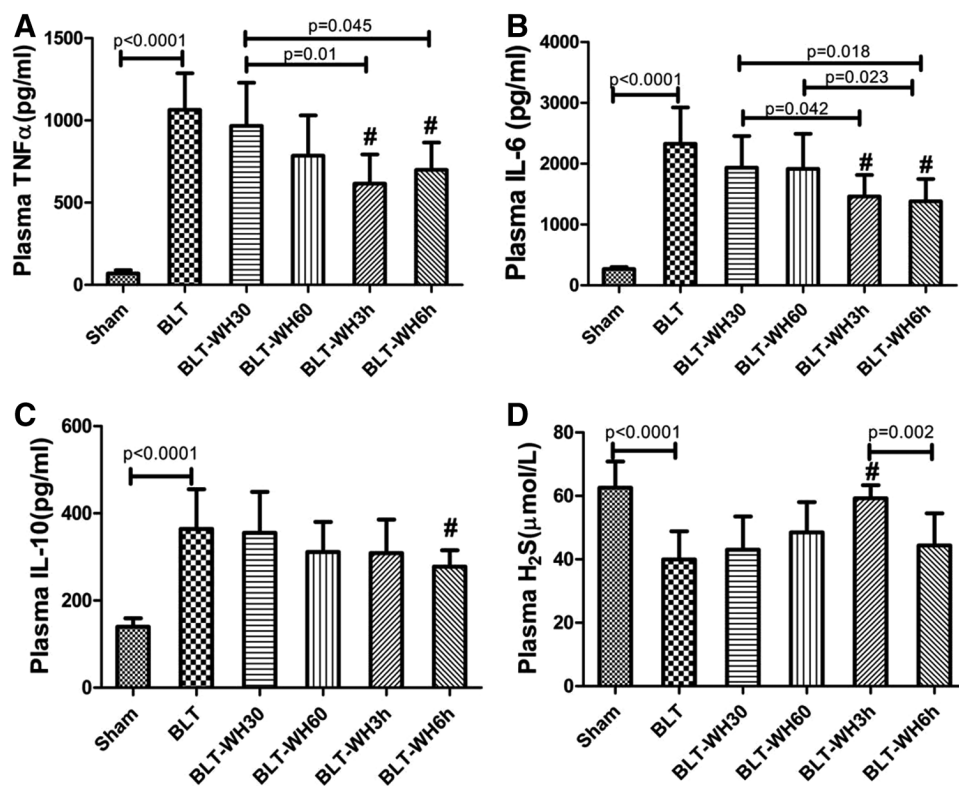

**Fig. 4.** The effects of whole-body hypothermia treatment on plasma cytokines and hydrogen sulfide (H<sub>2</sub>S) level in blast limb trauma rats. Tumor necrosis factor (TNF)-α (A), interleukin (IL)-6 (B), IL-10 (C), and H<sub>2</sub>S (D) in plasma. Data are shown for blast limb trauma (BLT) and BLT + whole-body hypothermia treatment for 30 min (BLT-WH30), 60 min (BLT-WH60), 3 h (BLT-WH3h), and 6 h (BLT-WH6h). Data are presented as mean ± SD (n = 12). #P < 0.05 versus BLT.

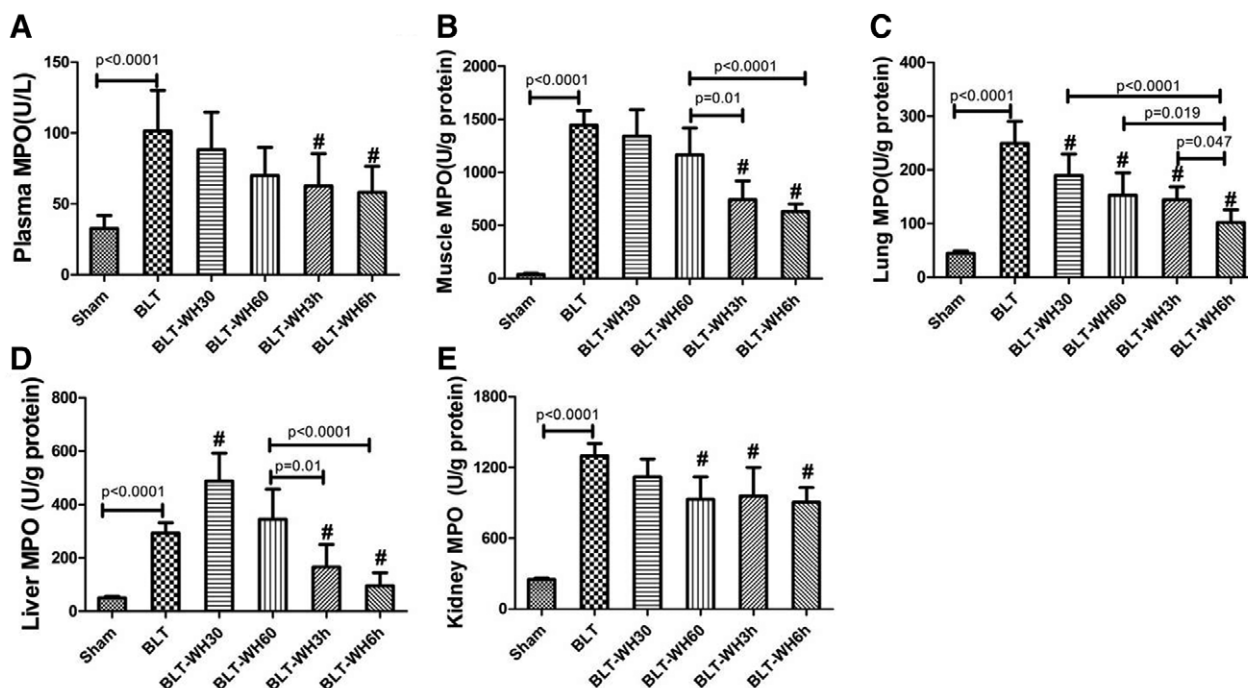

**Fig. 5.** The effects of whole-body hypothermia treatment on myeloperoxidase (MPO) activity in blast limb trauma rats. MPO activity is shown in plasma (A), muscle (B), lung (C), liver (D), and kidney (E). Data are shown for blast limb trauma (BLT) and blast limb trauma + whole-body hypothermia treatment for 30 min (BLT-WH30), 60 min (BLT-WH60), 3 h (BLT-WH3h), and 6 h (BLT-WH6h). Data are presented as mean ± SD (n = 12). #P < 0.05 versus BLT.

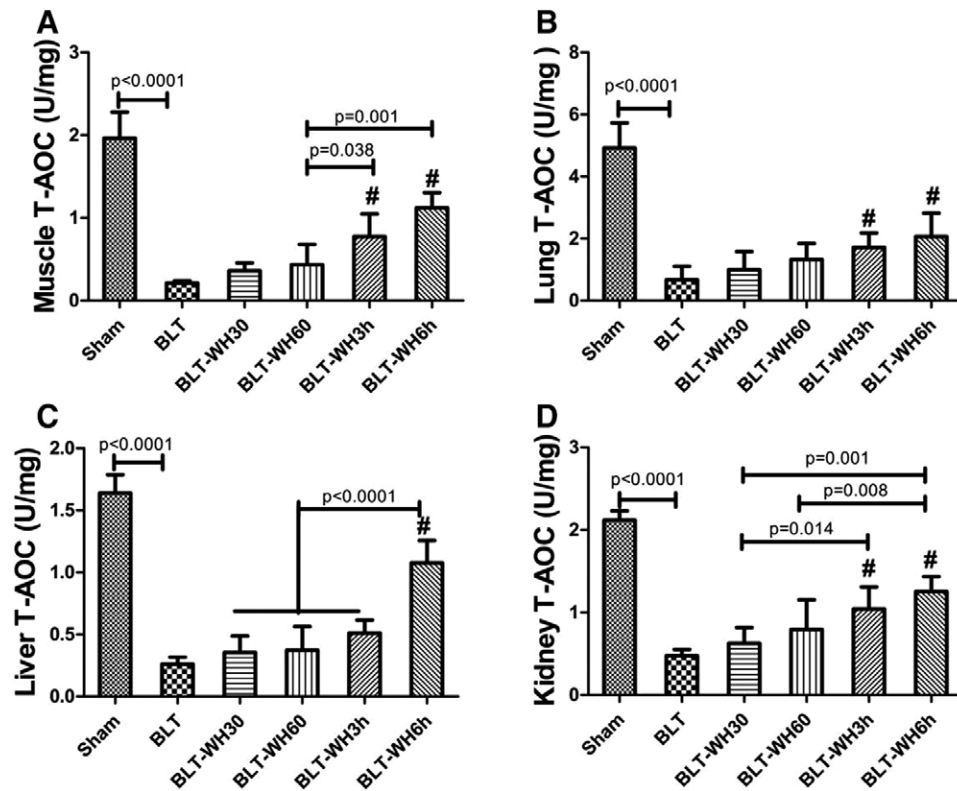

**Fig. 6.** The effects of whole-body hypothermia treatment on total antioxidation capacity (T-AOC) activity in blast limb trauma rats. T-AOC activity is shown in muscle (A), lung (B), liver (C), and kidney (D). Data are shown for blast limb trauma (BLT) and BLT + whole-body hypothermia treatment for 30 min (BLT-WH30), 60 min (BLT-WH60), 3 h (BLT-WH3h), and for 6 h (BLT-WH6h). Data are presented as mean  $\pm$  SD ( $n = 12$ ). # $P < 0.05$  versus BLT.

## Discussion

BLT results in not only local injury but also in distant-organ injuries, including the lung injury, as reported previously.<sup>4,23</sup> The current data demonstrate that WH treatment for 3 and 6 h protected multiple-organ injuries such as the traumatic limb, lungs, liver, and kidneys after BLT. The underlying mechanism may be associated with its suppression of neutrophil infiltration, restoration of the balance of proinflammatory and antiinflammatory responses, inhibition of lipid peroxidation and production of reactive oxygen species, and elevation of hydrogen sulfide production.

In the current study, the protective effects of different durations of mild hypothermia were assessed in the BLT rats; WH for 3 h was shown to be the effective and optimal duration that afforded protection to all organs tested without remarkable adverse effects when compared with WH for 30 min, 60 min, or 6 h. Although WH for 30 or 60 min alleviated the distant lung injury and water content, but it seems not long enough to attenuate local traumatic limb, liver and kidney injury. WH for 3 h corrected the changes of the most of biochemical variables, while WH for 6 h could further correct T-AOC in the lungs and liver but increased blood loss. Therefore, WH for 3 h after spontaneous rewarming is sufficient to provide both local tissue and distant-organ protection in the BLT rats and limits the adverse effects of

hypothermia. Our data reported here and those reported previously strongly suggest that different conditions need different durations of mild hypothermia for optimal outcome to be achieved.<sup>3,4,20,21</sup>

Hydrogen sulfide is a powerful biologic signal participating in many pathologic conditions<sup>24</sup> and was shown to be involved in the process of distant-organ injury after BLT.<sup>4,23</sup> Endogenous hydrogen sulfide is produced from L-cysteine by enzymes such as cystathionine  $\beta$ -synthase, CSE, 3-mercaptopyruvate sulfurtransferase, and cysteine aminotransferase.<sup>25</sup> Disturbance of hydrogen sulfide metabolism has been found in several disease conditions, such as ischemia-reperfusion injury,<sup>26</sup> acute lung injury,<sup>27</sup> hypertension,<sup>28</sup> atherosclerosis,<sup>29</sup> cirrhosis,<sup>30</sup> and kidney fibrosis.<sup>31</sup> Unlike other durations of hypothermia, WH for 3 h reversed the decreased plasma hydrogen sulfide level. The causes for this discrepancy remain unknown, but restoration of CSE activity could be one of many mechanisms. CSE is mainly expressed in the liver, kidney, and lungs,<sup>32</sup> and its activity was found to be decreased in these organs in the BLT rats, indicating that the decreased CSE activity is likely the main cause of decreased plasma hydrogen sulfide level after BLT.<sup>23</sup> It is reasonable to assume that WH for 6 h was too long and resulted in decreased metabolism rate because hydrogen sulfide is the metabolic product of L-cysteine, and all of

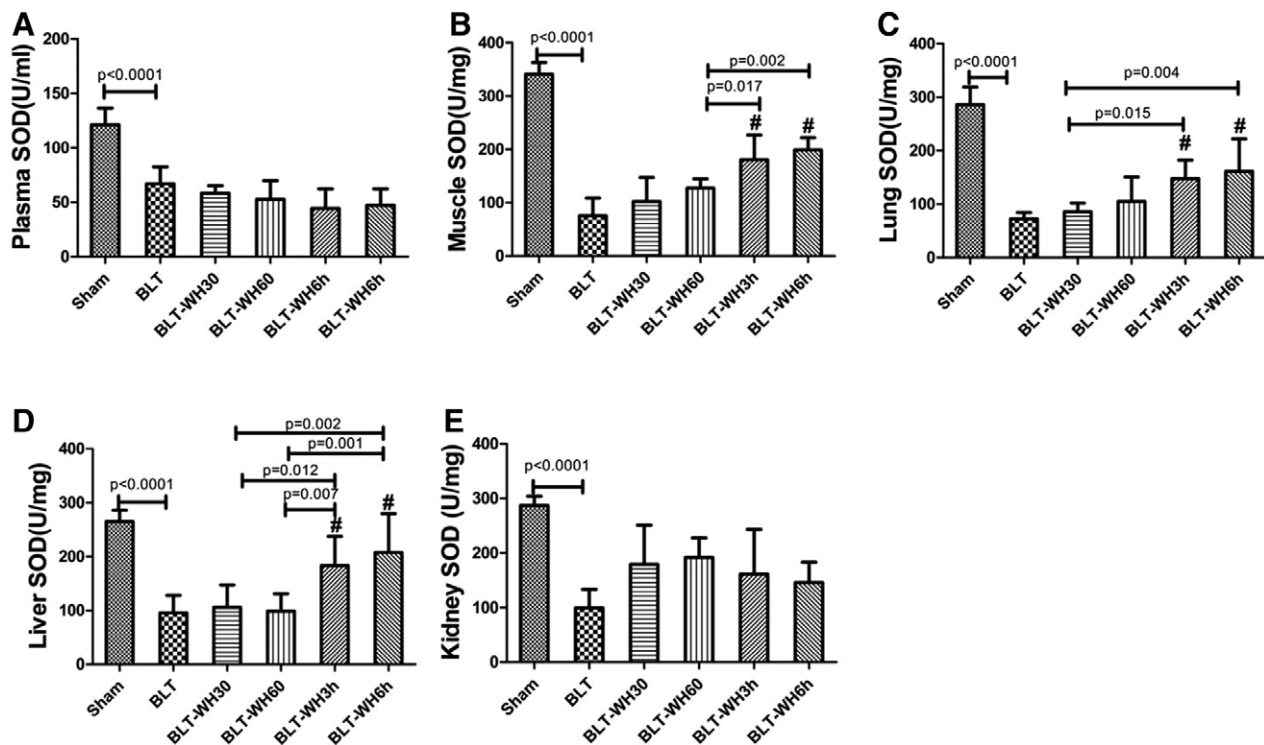

**Fig. 7.** The effects of whole-body hypothermia treatment on superoxide dismutase (SOD) activity in blast limb trauma rats. SOD activity is shown in plasma (A), muscle (B), lung (C), liver (D), and kidney (E). Data are shown for blast limb trauma (BLT) and BLT + whole-body hypothermia treatment for 30 min (BLT-WH30), 60 min (BLT-WH60), 3 h (BLT-WH3h), and 6 h (BLT-WH6h). Data are presented as mean  $\pm$  SD ( $n = 12$ ). # $P < 0.05$  versus BLT.

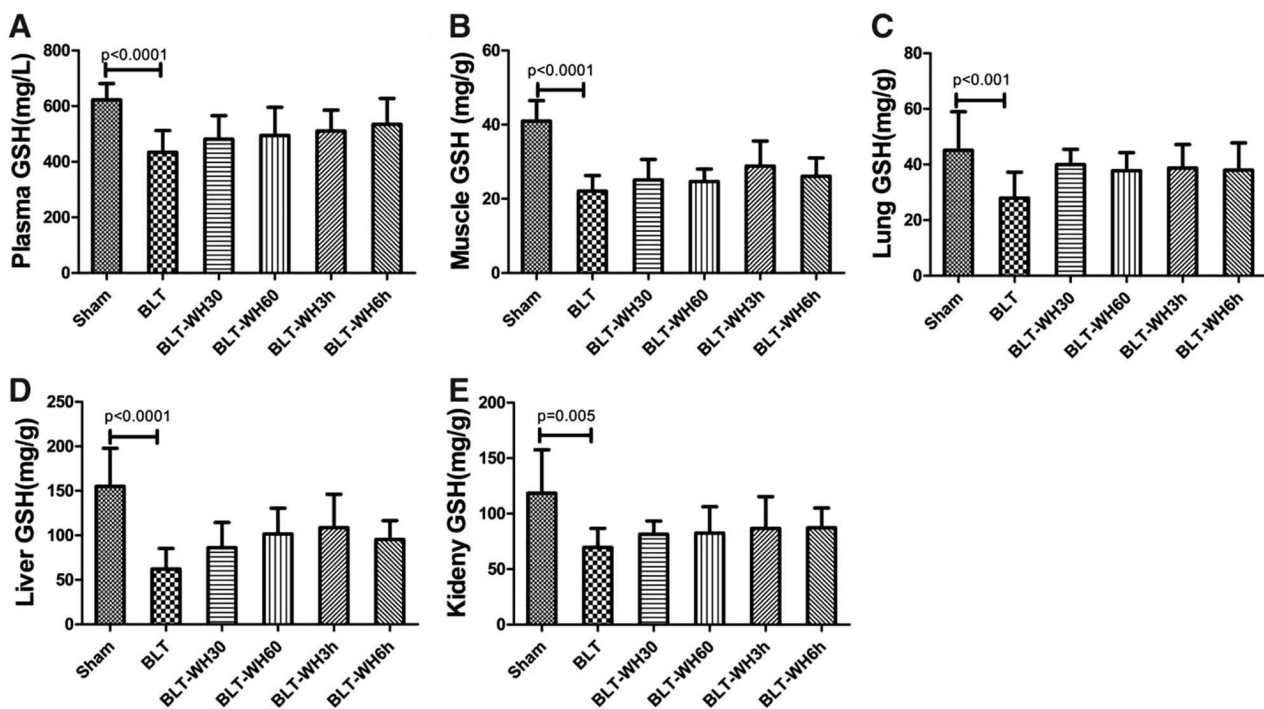

**Fig. 8.** The effects of whole-body hypothermia treatment on glutathione (GSH) level in blast limb trauma rats. GSH activity is shown in plasma (A), muscle (B), lung (C), liver (D), and kidney (E). Data are shown for blast limb trauma (BLT) and BLT + whole-body hypothermia treatment for 30 min (BLT-WH30), 60 min (BLT-WH60), 3 h (BLT-WH3h), and 6 h (BLT-WH6h). Data are presented as mean  $\pm$  SD ( $n = 12$ ).



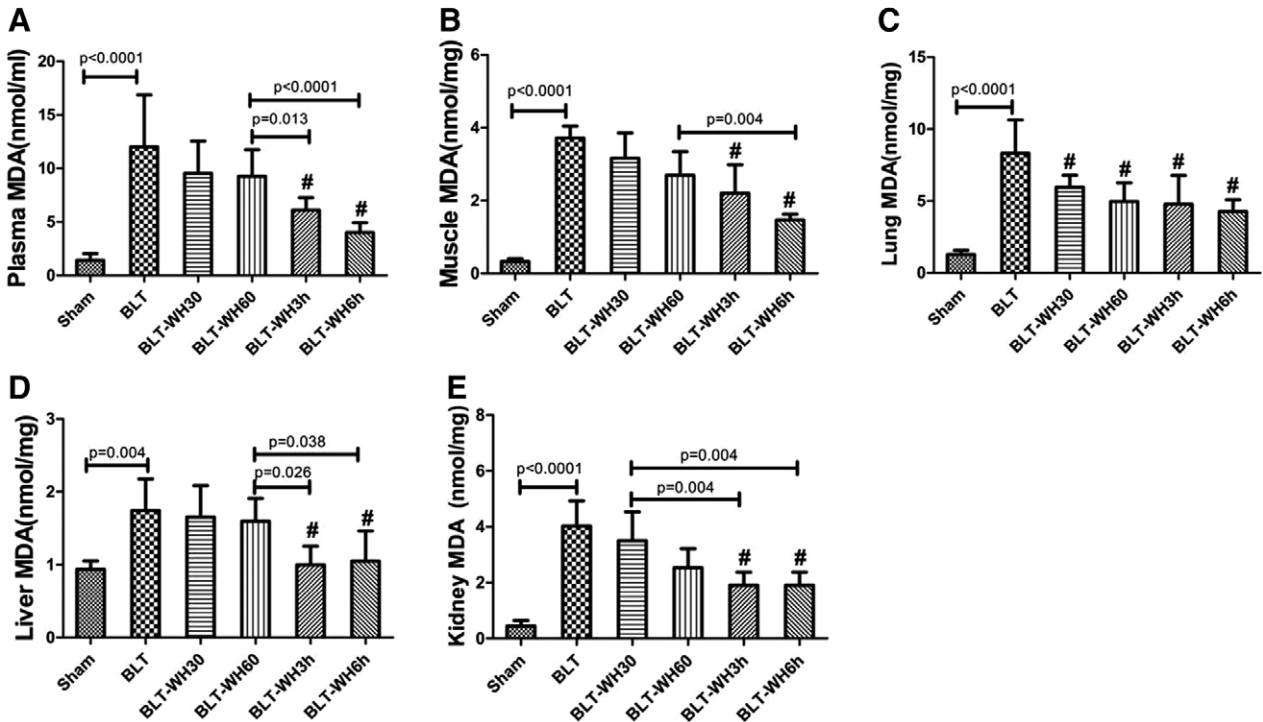

**Fig. 9.** The effects of whole-body hypothermia treatment on malondialdehyde (MDA) level in blast limb trauma rats. MDA activity is shown in plasma (A), muscle (B), lung (C), liver (D), and kidney (E). Data are shown for blast limb trauma (BLT) and BLT + whole-body hypothermia treatment for 30 min (BLT-WH30), 60 min (BLT-WH60), 3 h (BLT-WH3h), and 6 h (BLT-WH6h). Data are presented as mean  $\pm$  SD ( $n = 12$ ). # $P < 0.05$  versus BLT.

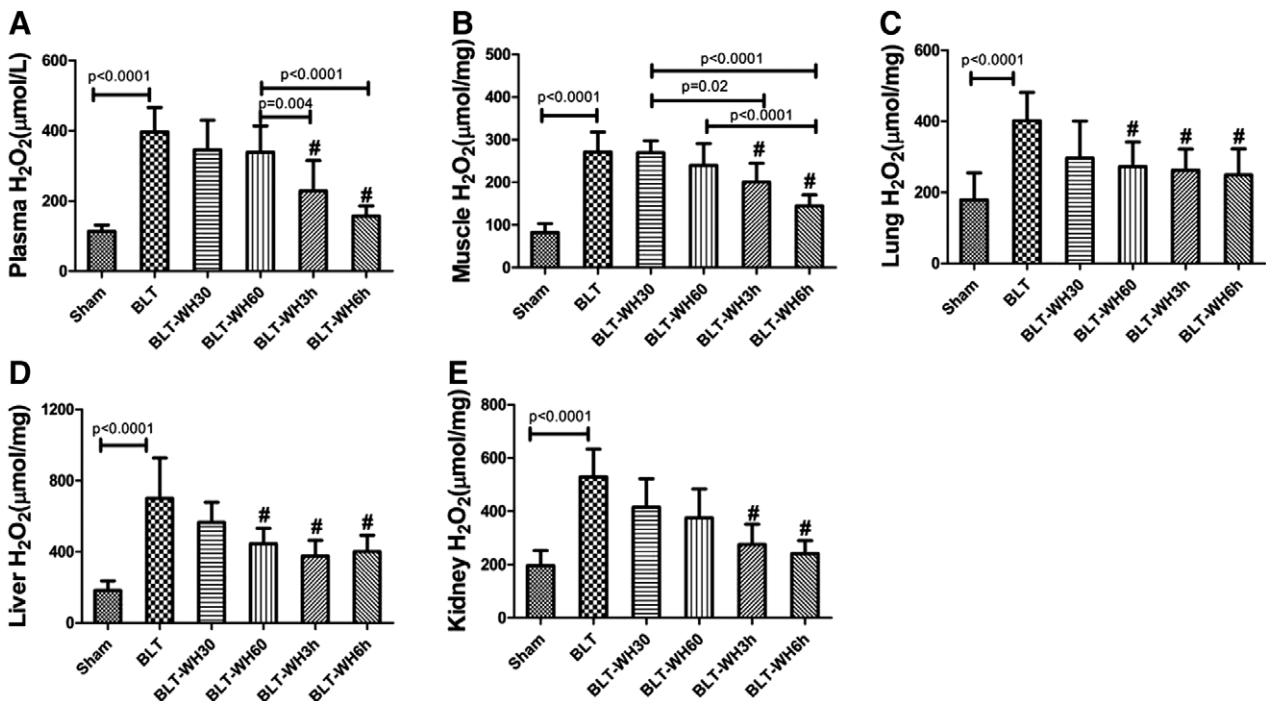

**Fig. 10.** The effects of whole-body hypothermia treatment on hydrogen peroxide ( $H_2O_2$ ) level in blast limb trauma rats.  $H_2O_2$  activity is shown in plasma (A), muscle (B), lung (C), liver (D), and kidney (E). Data are shown for blast limb trauma (BLT) and BLT + whole-body hypothermia treatment for 30 min (BLT-WH30), 60 min (BLT-WH60), 3 h (BLT-WH3h), and 6 h (BLT-WH6h). Data are presented as mean  $\pm$  SD ( $n = 12$ ). # $P < 0.05$  versus BLT.

substance metabolism is closely associated with reaction temperature and thus reduced the hydrogen sulfide production in the BLT rats, which warrants further study. Therapeutic hypothermia for 3 h *per se* may restore hydrogen sulfide production *via* increasing the release of dopamine and serotonin and other biogenic amines in the BLT rats.<sup>33,34</sup> Hydrogen sulfide has been found to afford multiple-organ protection, and it is true that exogenous hydrogen sulfide donor has been shown to alleviate ischemia–reperfusion injury of the lungs,<sup>35</sup> liver,<sup>36</sup> and kidney.<sup>37</sup> In addition, exogenous hydrogen sulfide donor, sodium hydrosulfide, was found to attenuate distant lung injury after BLT in our previous study,<sup>38</sup> which is very likely to be due to inhibition of nuclear factor- $\kappa$ B activity, suppression of oxidative stress, preservation of function and structure of mitochondria, and up-regulation of prosurvival signal pathway.<sup>39</sup> Thus, restoring hydrogen sulfide may be considered to be one of mechanisms underlying multiple-organ protection afforded by WH for 3 h in the BLT rats. However, WH for 6 h also provided protection for the distant organs although it did not restore plasma hydrogen sulfide level when compared with 3 h, which may suggest that multiple mechanisms are responsible for organ protection afforded by WH.

Inflammatory response is considered to play a key role in distant-organ injury. An early increase of proinflammatory cytokines after tissue trauma and hemorrhage has been well described in animal and clinical studies. TNF $\alpha$  and interleukin-6 were found to be increased earlier than interleukin-10 after BLT in rats.<sup>23</sup> It is well established that excessive TNF $\alpha$  plays a critical role in systemic inflammation and a pathophysiologic role in the development of MODS. Interleukin-6 is an important cytokine in the progress of inflammatory response *via* delaying apoptosis of neutrophil<sup>32</sup> and mediating the hepatic acute phase response,<sup>30</sup> and it adopts a central regulatory role in primary cellular and humoral immune activation.<sup>32,33</sup> Antiinflammatory cytokines that are up-regulated after hyperinflammatory response triggered by insults have been considered to keep the balance between proinflammatory and antiinflammatory reactions. Interleukin-10 is the pleiotropic antiinflammatory cytokine, and its main biologic function is to limit inflammatory response *via* regulating the differentiation and proliferation of several immune cells such as T, B, natural killer, and antigen-presenting cells.<sup>40</sup> Both proinflammatory and antiinflammatory cytokines have been reported to be involved in the protective effects of hypothermia.<sup>41</sup> Indeed, hypothermia has been reported to block the inflammatory “cascade” reaction and thus attenuate the organ damage.<sup>42</sup> Plasma TNF $\alpha$ , interleukin-6, and interleukin-10 were found to be reduced by WH treatment in the current study; however, proinflammatory cytokines were prone to be suppressed by WH treatment when compared with antiinflammatory cytokines, which is confirmed by the elevated TNF $\alpha$ /interleukin-10 ratios by WH treatment for 3 h (BLT: 2.92 *vs.* BLT-WH3h: 1.99), which could be at least partly contributed to the organ protection by WH as well.

Oxidative stress is also an important component of systemic inflammatory response and MODS. Oxidative stress damages the parenchyma cells and microvessel endothelium and results in increased capillary permeability and edema. It has been suggested that hypothermia suppresses mitochondrial oxidative stress and also preserves energy supply.<sup>43</sup> WH treatment for 3 or 6 h reduced production of hydrogen peroxide and malondialdehyde and preserved T-AOC in concerned organs, and WH for 3 or 6 h were shown to elevate SOD activity in the muscle, lungs, and liver; however, it had no pronounced effects on the glutathione level in all concerned organs. All these data suggested that WH treatment for 3 or 6 h may be more effective in the suppression of oxidation production than in the promotion of endogenous antioxidative protein expression, which is different from regional hypothermia. This viewpoint was supported by data showing that WH for 3 or 6 h does not increase Nrf2 (a key transcription factor for antioxidant genes) activity in the lungs (data not shown), but rather that regional hypothermia for 30 min could upregulate Nrf2 activity.<sup>4</sup> Activated macrophage is the main source of reactive oxygen species,<sup>44</sup> and reduced macrophage infiltration contributed to the suppression of oxidative stress by WH in the BLT rats, which confirms that WH for 3 or 6 h reduced myeloperoxidase activity in concerned organs and blood circulation.

WH has been reported to improve the hemodynamics states in different disease conditions, such as cardiogenic shock syndrome,<sup>45</sup> hemorrhagic shock,<sup>46</sup> and sepsis.<sup>47</sup> WH could affect cardiac output, systemic vascular resistance, left ventricular contractility, and heart rate.<sup>45</sup> However, MAP was not profoundly affected by WH treatment in this study, which suggested that stabilization of hemodynamics did not contribute to the WH-associated organ protection in the BLT rats. In the current study, although significant benefit could be achieved, WH treatment for 6 h was found to increase blood loss because prolonged WH treatment may impair coagulation function.<sup>48,49</sup> In addition, prolonged WH treatment also causes other well-known adverse effects including acid–base imbalance and immune suppression.<sup>50,51</sup> Yet, it is clinically important to keep traumatic patients warm for better tissue or cellular oxygenation. Our data reported here may suggest that cooling patients at earlier stage after trauma may have therapeutic value, but, undoubtedly, data obtained from rodents in the current study are far from clinical situation. Therefore, better designed preclinical studies with large animals as study subjects and clinical trials comparing therapeutic effectiveness of “warm,” global (current data) or regional hypothermia<sup>4</sup> in treating traumatic patients are urgently needed.

Our study had several limitations. First, this blast model did not include penetrating wounds and severe contamination, and debridement was not performed in this severe blast limb model, which are different from clinical situation. Second, the time course of this study was only 6 h, and the

long-term outcomes of the treatment are not known. Third, vital-organ injuries observed in this study may not be necessarily due to subsequent BLT only but may also be due to explosion wave produced by blast or the combination of both.<sup>23</sup> Fourth, our data reflect blast trauma specifically, but not surgical “trauma,” which has also been shown to cause remote lung injury recently.<sup>52,53</sup> Lastly, preclinical rodent model is far from clinical settings, and also the “favorable” effects of hypothermia on the biomarkers measured in this study are only “observable” changes; the causal relationship is unknown and therefore the translation of our findings to clinical condition requires more studies in big animal models and preclinical studies.

In conclusion, the current data show that WH for 3 h provided multiple-organ protection in the BLT rats *via* suppressing oxidative stress, restoring balance between proinflammatory and antiinflammatory reactions and elevating endogenous hydrogen sulfide production without adverse effects. Our current study could facilitate more studies in this area of research; until then, any therapeutic values of systemic hypothermia will remain unknown.

## Acknowledgments

The authors thank the team at the Department of Traumatic Surgery, Institute of Surgery Research, Third Military Medical University, Chongqing, China, for their help.

This study was supported by the grant from National Natural Science Foundation of China (grant no. 81470267).

## Competing Interests

The authors declare no competing interests.

## Correspondence

Address correspondence to Dr. Lu: Department of Anesthesiology, Southwest Hospital, Third Military Medical University, 30 Gaotanyan Street, Chongqing, China. lukaizhi@163.net. Information on purchasing reprints may be found at [www.anesthesiology.org](http://www.anesthesiology.org) or on the masthead page at the beginning of this issue. ANESTHESIOLOGY's articles are made freely accessible to all readers, for personal use only, 6 months from the cover date of the issue.

## References

- Mathieu L, Saint-Macary E, Frank M, Bertani A, Rongieras F, Balandraud P, Rigal S: Multiple blast extremity injuries: Is definitive treatment achievable in a field hospital for local casualties? *Int Orthop* 2014; 38:2565–9
- Polfer EM, Forsberg JA, Fleming ME, Potter BK: Neurovascular entrapment due to combat-related heterotopic ossification in the lower extremity. *J Bone Joint Surg Am* 2013; 95:e195(1–6)
- Zhao H, Ning J, Duan J, Gu J, Yi B, Lu K, Mo L, Lai X, Hennah L, Ma D: Regional traumatic limb hypothermia attenuates distant hepatic and renal injury following blast limb trauma in rats. *J Trauma Acute Care Surg* 2014; 77:464–70
- Ning J, Mo L, Zhao H, Lu K, Wang L, Lai X, Yang B, Zhao H, Sanders RD, Ma D: Transient regional hypothermia applied to a traumatic limb attenuates distant lung injury following blast limb trauma. *Crit Care Med* 2014; 42:e68–78
- Varon J, Acosta P: Therapeutic hypothermia: Past, present, and future. *Chest* 2008; 133:1267–74
- De Deyne CS: Therapeutic hypothermia and traumatic brain injury. *Curr Opin Anaesthesiol* 2010; 23:258–62
- Wu X, Drabek T, Kochanek PM, Henchir J, Stezoski SW, Stezoski J, Cochran K, Garman R, Tisherman SA: Induction of profound hypothermia for emergency preservation and resuscitation allows intact survival after cardiac arrest resulting from prolonged lethal hemorrhage and trauma in dogs. *Circulation* 2006; 113:1974–82
- Young MN, Hollenbeck RD, Pollock JS, McPherson JA, Fredi JL, Piana RN, Mah ML, Fish FA, Markham L: Effectiveness of mild therapeutic hypothermia following cardiac arrest in adult patients with congenital heart disease. *Am J Cardiol* 2014; 114:128–30
- Selewski DT, Jordan BK, Askenazi DJ, Dechert RE, Sarkar S: Acute kidney injury in asphyxiated newborns treated with therapeutic hypothermia. *J Pediatr* 2013; 162: 725–729.e1
- Moore EM, Nichol AD, Bernard SA, Bellomo R: Therapeutic hypothermia: Benefits, mechanisms and potential clinical applications in neurological, cardiac and kidney injury. *Injury* 2011; 42:843–54
- Han Y, Song ZJ, Tong CY, Li CS: Effects of hypothermia on the liver in a swine model of cardiopulmonary resuscitation. *World J Emerg Med* 2013; 4:298–303
- Marotta SE, Belchikov Y, Siegel MD: Hypothermia and protection from acetaminophen-induced liver injury. *Ther Hypothermia Temp Manag* 2011; 1:57–60
- Testori C, Sterz F, Holzer M, Losert H, Arrich J, Herkner H, Krizanac D, Wallmüller C, Stratil P, Schober A, Hörburger D, Stöckl M, Weiser C, Uray T: The beneficial effect of mild therapeutic hypothermia depends on the time of complete circulatory standstill in patients with cardiac arrest. *Resuscitation* 2012; 83:596–601
- Zhao H, Steinberg G: Limited therapeutic time windows of mild-to-moderate hypothermia in a focal ischemia model in rat. *Stroke Res Treat* 2011; 2011:131834
- Nozari A, Safar P, Stezoski SW, Wu X, Henchir J, Radovsky A, Hanson K, Klein E, Kochanek PM, Tisherman SA: Mild hypothermia during prolonged cardiopulmonary cerebral resuscitation increases conscious survival in dogs. *Crit Care Med* 2004; 32:2110–6
- Tokutomi T, Morimoto K, Miyagi T, Yamaguchi S, Ishikawa K, Shigemori M: Optimal temperature for the management of severe traumatic brain injury: Effect of hypothermia on intracranial pressure, systemic and intracranial hemodynamics, and metabolism. *Neurosurgery* 2003; 52:102–11; discussion 111–2
- Handrigan MT, Bentley TB, Oliver JD, Tabaku LS, Burge JR, Atkins JL: Choice of fluid influences outcome in prolonged hypotensive resuscitation after hemorrhage in awake rats. *Shock* 2005; 23:337–43
- Jiang S, He X, Wang J, Zhou G, Zhang M, Ba L, Yang J, Zhao X: Therapeutic mild hypothermia improves early outcomes in rabbits subjected to traumatic uncontrolled hemorrhagic shock. *J Surg Res* 2013; 179:145–52
- Che D, Li L, Kopil CM, Liu Z, Guo W, Neumar RW: Impact of therapeutic hypothermia onset and duration on survival, neurologic function, and neurodegeneration after cardiac arrest. *Crit Care Med* 2011; 39:1423–30
- Li T, Lin X, Zhu Y, Li L, Liu L: Short-term, mild hypothermia can increase the beneficial effect of permissive hypotension on uncontrolled hemorrhagic shock in rats. *ANESTHESIOLOGY* 2012; 116:1288–98
- Fröhlich M, Hildebrand F, Weuster M, Mommsen P, Mohr J, Witte I, Raeven P, Ruchholtz S, Flohé S, van Griensven M, Pape HC, Pfeifer R: Induced hypothermia reduces the hepatic inflammatory response in a swine multiple trauma model. *J Trauma Acute Care Surg* 2014; 76:1425–32



22. Huang PS, Tang GJ, Chen CH, Kou YR: Whole-body moderate hypothermia confers protection from wood smoke-induced acute lung injury in rats: The therapeutic window. *Crit Care Med* 2006; 34:1160–7
23. Ning JL, Mo LW, Lu KZ, Lai XN, Wang ZG, Ma D: Lung injury following lower extremity blast trauma in rats. *J Trauma Acute Care Surg* 2012; 73:1537–44
24. Jin Z, Chan H, Ning J, Lu K, Ma D: The role of hydrogen sulfide in pathologies of the vital organs and its clinical application. *J Physiol Pharmacol* 2015; 66:169–79
25. Wang X, Wang Q, Guo W, Zhu YZ: Hydrogen sulfide attenuates cardiac dysfunction in a rat model of heart failure: A mechanism through cardiac mitochondrial protection. *Biosci Rep* 2011; 31:87–98
26. Henderson PW, Singh SP, Weinstein AL, Nagineni V, Rafii DC, Kadouch D, Krijgh DD, Spector JA: Therapeutic metabolic inhibition: Hydrogen sulfide significantly mitigates skeletal muscle ischemia reperfusion injury *in vitro* and *in vivo*. *Plast Reconstr Surg* 2010; 126:1890–8
27. Ang SF, Sio SW, Moomchala SM, MacAry PA, Bhatia M: Hydrogen sulfide upregulates cyclooxygenase-2 and prostaglandin E metabolite in sepsis-evoked acute lung injury *via* transient receptor potential vanilloid type 1 channel activation. *J Immunol* 2011; 187:4778–87
28. Wang K, Ahmad S, Cai M, Rennie J, Fujisawa T, Crispi F, Bailly J, Miller MR, Cudmore M, Hadoke PW, Wang R, Gratacós E, Buhimschi IA, Buhimschi CS, Ahmed A: Dysregulation of hydrogen sulfide producing enzyme cystathionine  $\gamma$ -lyase contributes to maternal hypertension and placental abnormalities in preeclampsia. *Circulation* 2013; 127:2514–22
29. Mani S, Li H, Untereiner A, Wu L, Yang G, Austin RC, Dickhout JG, Lhoták Š, Meng QH, Wang R: Decreased endogenous production of hydrogen sulfide accelerates atherosclerosis. *Circulation* 2013; 127:2523–34
30. Babaei-Karamshahlou M, Hooshmand B, Hajizadeh S, Mani AR: The role of endogenous hydrogen sulfide in pathogenesis of chronotropic dysfunction in rats with cirrhosis. *Eur J Pharmacol* 2012; 696:130–5
31. Jung KJ, Jang HS, Kim JI, Han SJ, Park JW, Park KM: Involvement of hydrogen sulfide and homocysteine transsulfuration pathway in the progression of kidney fibrosis after ureteral obstruction. *Biochim Biophys Acta* 2013; 1832:1989–97
32. Renga B: Hydrogen sulfide generation in mammals: The molecular biology of cystathionine- $\beta$ -synthase (CBS) and cystathionine- $\gamma$ -lyase (CSE). *Inflamm Allergy Drug Targets* 2011; 10:85–91
33. Emirbikov EE, Ibragimov II, Abdullaev RA: [Distribution of biogenic amines in rat brain with hypothermia]. *Ukr Biokhim Zh* (1978) 1978; 50:296–8
34. Talaei F, Bouma HR, Van der Graaf AC, Strijkstra AM, Schmidt M, Henning RH: Serotonin and dopamine protect from hypothermia/rewarming damage through the CBS/H2S pathway. *PLoS One* 2011; 6:e22568
35. Fu Z, Liu X, Geng B, Fang L, Tang C: Hydrogen sulfide protects rat lung from ischemia-reperfusion injury. *Life Sci* 2008; 82:1196–202
36. Zhang Q, Fu H, Zhang H, Xu F, Zou Z, Liu M, Wang Q, Miao M, Shi X: Hydrogen sulfide preconditioning protects rat liver against ischemia/reperfusion injury by activating Akt-GSK-3 $\beta$  signaling and inhibiting mitochondrial permeability transition. *PLoS One* 2013; 8:e74422
37. Lobb I, Zhu J, Liu W, Haig A, Lan Z, Sener A: Hydrogen sulfide treatment ameliorates long-term renal dysfunction resulting from prolonged warm renal ischemia-reperfusion injury. *Can Urol Assoc J* 2014; 8:E413–8
38. Ning J, Mo L, Zhao H, Lu K, Lai X, Luo X, Zhao H, Ma D: Sodium hydrosulphide alleviates remote lung injury following limb traumatic injury in rats. *PLoS One* 2013; 8:e59100
39. Badiei A, Muniraj N, Chambers S, Bhatia M: Inhibition of hydrogen sulfide production by gene silencing attenuates inflammatory activity by downregulation of NF- $\kappa$ B and MAP kinase activity in LPS-activated RAW 264.7 cells. *Biomed Res Int* 2014; 2014:848570
40. Shouval DS, Biswas A, Goettel JA, McCann K, Conaway E, Redhu NS, Mascanfroni ID, Al Adham Z, Lavoie S, Ibourk M, Nguyen DD, Samsom JN, Escher JC, Somech R, Weiss B, Beier R, Conklin LS, Ebens CL, Santos FG, Ferreira AR, Sherlock M, Bhan AK, Müller W, Mora JR, Quintana FJ, Klein C, Muise AM, Horwitz BH, Snapper SB: Interleukin-10 receptor signaling in innate immune cells regulates mucosal immune tolerance and anti-inflammatory macrophage function. *Immunity* 2014; 40:706–19
41. Sarcia PJ, Scumpia PO, Moldawer LL, DeMarco VG, Skimming JW: Hypothermia induces interleukin-10 and attenuates injury in the lungs of endotoxemic rats. *Shock* 2003; 20:41–5
42. Gundersen Y, Vaagenes P, Pharo A, Valø ET, Opstad PK: Moderate hypothermia blunts the inflammatory response and reduces organ injury after acute haemorrhage. *Acta Anaesthesiol Scand* 2001; 45:994–1001
43. Gong P, Li CS, Hua R, Zhao H, Tang ZR, Mei X, Zhang MY, Cui J: Mild hypothermia attenuates mitochondrial oxidative stress by protecting respiratory enzymes and upregulating MnSOD in a pig model of cardiac arrest. *PLoS One* 2012; 7:e35313
44. Cuschieri J, Maier RV: Oxidative stress, lipid rafts, and macrophage reprogramming. *Antioxid Redox Signal* 2007; 9:1485–97
45. Zobel C, Adler C, Kranz A, Seck C, Pfister R, Hellmich M, Kochanek M, Reuter H: Mild therapeutic hypothermia in cardiogenic shock syndrome. *Crit Care Med* 2012; 40:1715–23
46. Nishi K, Takasu A, Shibata M, Uchino S, Yamamoto Y, Sakamoto T: Hypothermia reduces resuscitation fluid volumes required to maintain blood pressure in a rat hemorrhagic shock model. *J Trauma Acute Care Surg* 2012; 72:130–5
47. Schwarzl M, Seiler S, Wallner M, von Lewinski D, Huber S, Maechler H, Steendijk P, Zelzer S, Truschig-Wilders M, Obermayer-Pietsch B, Lueger A, Pieske BM, Post H: Mild hypothermia attenuates circulatory and pulmonary dysfunction during experimental endotoxemia. *Crit Care Med* 2013; 41:e401–10
48. Heinius G, Hahn RG, Sonden A: Hypothermia increases rebleeding during uncontrolled hemorrhage in the rat. *Shock* 2011; 36:60–6
49. Watts DD, Trask A, Soeken K, Perdue P, Dols S, Kaufmann C: Hypothermic coagulopathy in trauma: Effect of varying levels of hypothermia on enzyme speed, platelet function, and fibrinolytic activity. *J Trauma* 1998; 44:846–54
50. Hildebrand F, Giannoudis PV, van Griensven M, Chawda M, Pape HC: Pathophysiologic changes and effects of hypothermia on outcome in elective surgery and trauma patients. *Am J Surg* 2004; 187:363–71
51. Bernard SA, Buist M: Induced hypothermia in critical care medicine: A review. *Crit Care Med* 2003; 31:2041–51
52. Zhao H, Huang H, Ologunde R, Lloyd DG, Watts H, Vizcaychipi MP, Lian Q, George AJ, Ma D: Xenon treatment protects against remote lung injury after kidney transplantation in rats. *ANESTHESIOLOGY* 2015; 122:1312–26
53. Zhao H, Ning J, Lemaire A, Koumpa FS, Sun JJ, Fung A, Gu J, Yi B, Lu K, Ma D: Necroptosis and parthanatos are involved in remote lung injury after receiving ischemic renal allografts in rats. *Kidney Int* 2015; 87:738–48
